# Supplementary material for: Effects of Organic Acid Root Exudates of Malus hupehensis Rehd. Derived from Soil and Root Leaching Liquor from Orchards with Apple Replant Disease
Source: MDPI journal article supplement (doi:10.3390/plants11212968), 2022-11-03
Supplement: s1 [file s1]

## Supplementary material

**Table S1.** Process diagram

| Treatment   |     |       |      |      |      |      |     |
|-------------|-----|-------|------|------|------|------|-----|
|             | CK  | Low   |      |      |      | High |     |
| root: water | A0  | A1    | A2   | A3   | A4   | A5   | A6  |
|             | 0:1 | 1:100 | 1:40 | 1:20 | 1:10 | 1:2  | 1:1 |
| soil: water | B0  | B1    | B2   | B3   | B4   | B5   | B6  |
|             | 0:1 | 1:100 | 1:40 | 1:20 | 1:10 | 1:2  | 1:1 |

Note: Named the root extract A, the soil extract B, and the low concentration A1-A3, B1-B3; High concentrations for A4-A6, B4-B6.

**Table S2.** Gradient eluting procedure

| Time (min) | A% Water | B% Acetonitrile |
|------------|----------|-----------------|
| -5.0       | 60       | 40              |
| 0          | 60       | 40              |
| 2          | 60       | 40              |
| 22         | 0        | 100             |
| 32         | 0        | 100             |
| 32.1       | 60       | 40              |

**Table S3.** Fluorescence detector's changes in procedures wavelength

| Time (min) | Excitation wavelength(nm) | Emission wavelength(nm) |
|------------|---------------------------|-------------------------|
| 0.00       | 256                       | 390                     |
| 14.80      | 275                       | 420                     |
| 17.00      | 270                       | 385                     |
| 21.00      | 290                       | 430                     |
| 25.90      | 305                       | 480                     |
| 32.00      | 256                       | 390                     |

**Table S4.** Gradient eluting procedure

| Time(min) | A% Water | B% Acetonitrile |
|-----------|----------|-----------------|
| 0         | 90       | 10              |
| 30        | 65       | 35              |
| 40        | 65       | 35              |
| 42        | 90       | 10              |
| 45        | 90       | 10              |

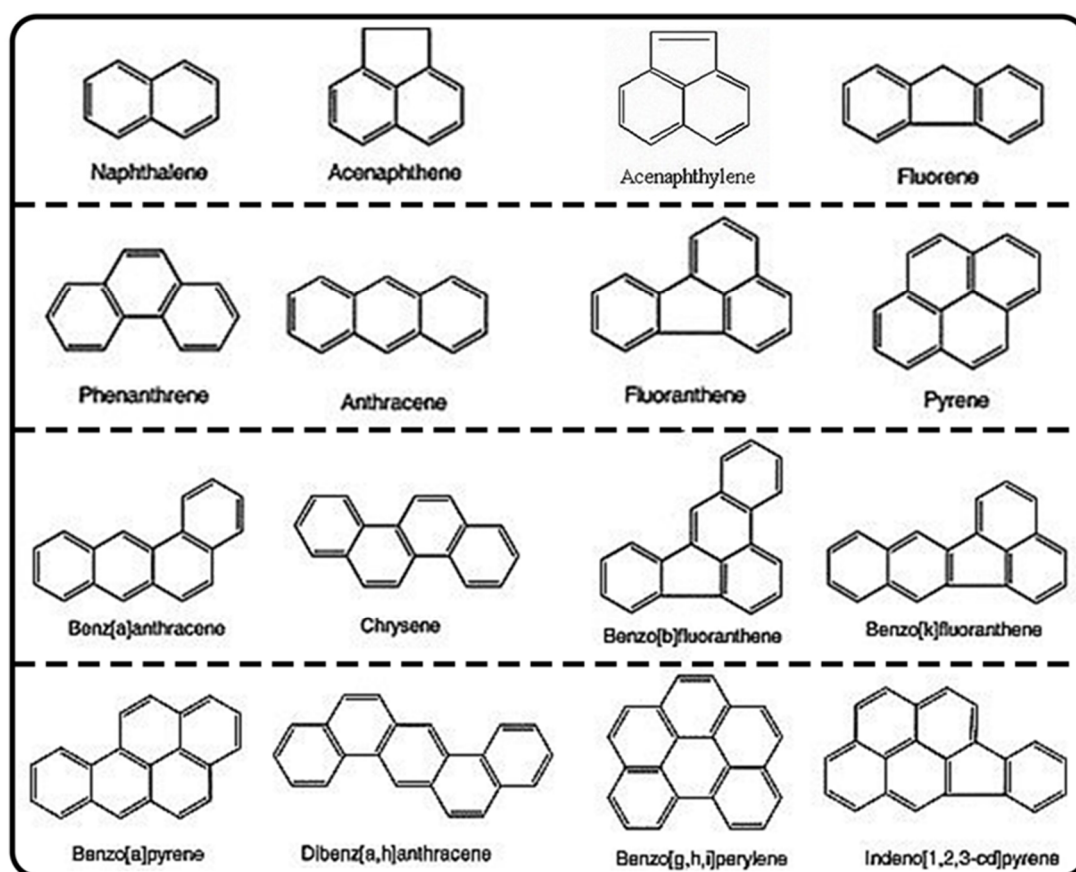

Figure S1. 16 PAHs of EPA priority control

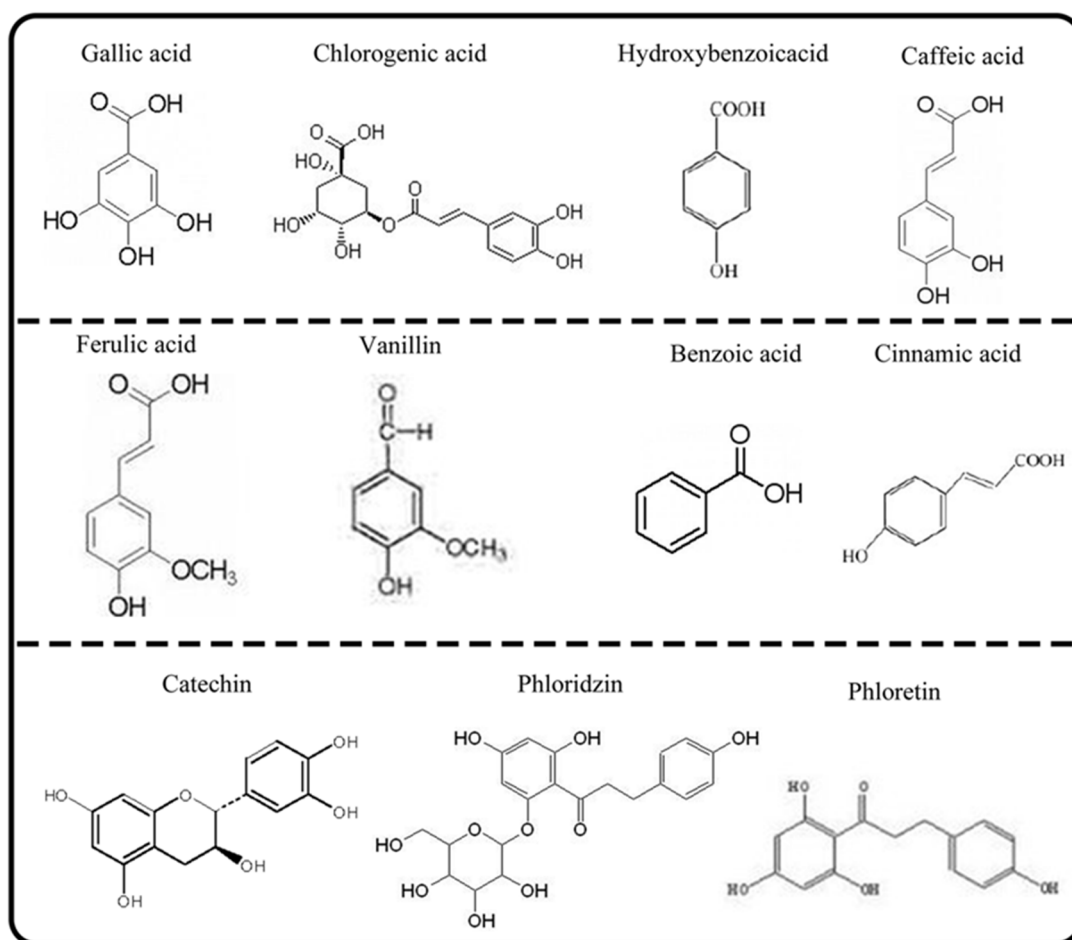

**Figure S2.** Structure of phenolics compounds

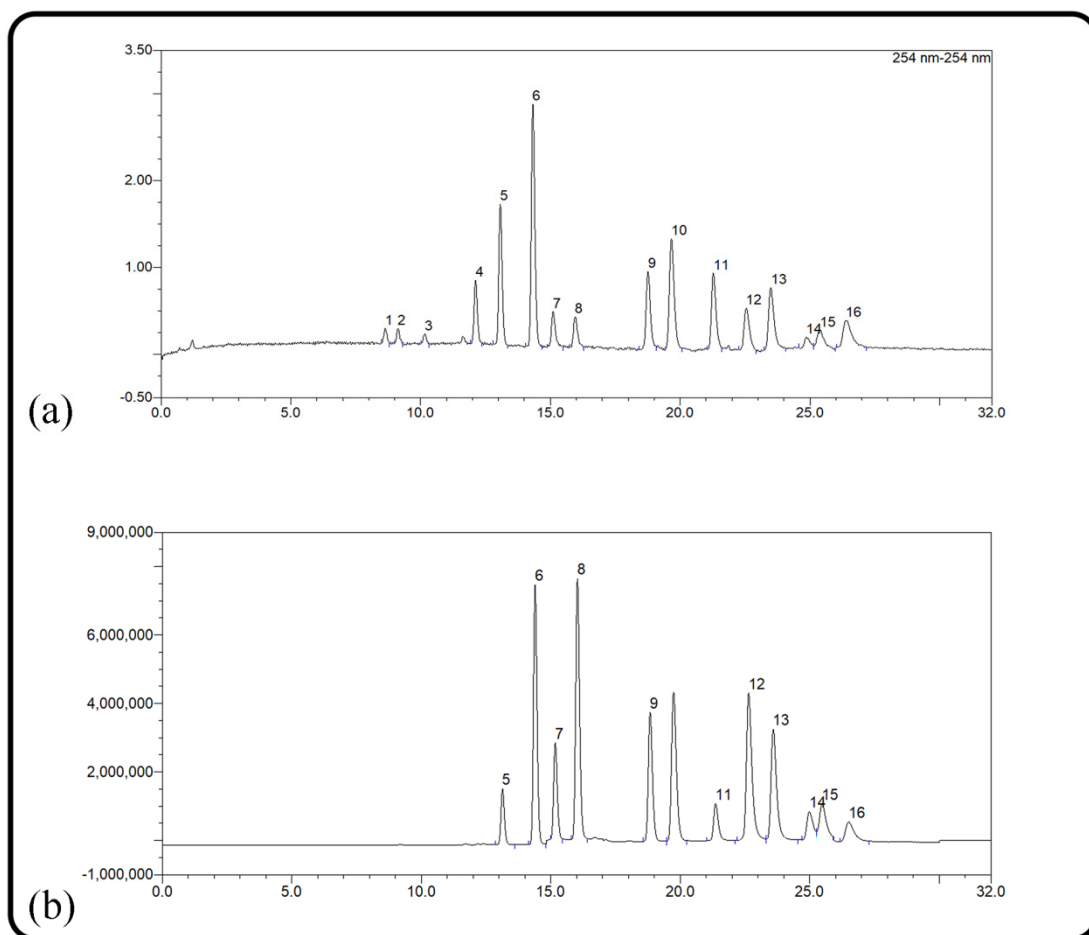

**Figure S3.** Standard sample 1 ((200 ng/g) in 254nm ultraviolet detection), 2 ((20 ng/g) in different wavelengths fluorescence detection)

1-Nap, 2-Ace, 3-Acy, 4-Flu, 5-Phe, 6-Ant, 7-Flt, 8-Pyr, 9-Baa, 10-Chr, 11-Bbf, 12-Bkf, 13-Bap, 14-Daa, 15-Bpe, 16-Ilp

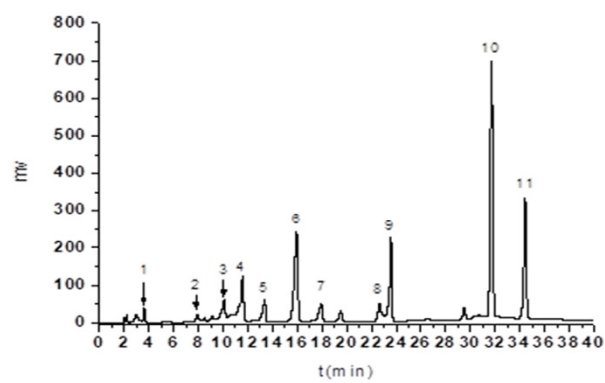

**Figure.S4** Standard sample in 280nm ultraviolet detection

1-Gallic acid, 2-Chlorogenic acid, 3-Hydroxybenzoic acid, 4-Catechin, 5-Caffeic acid, 6- Ferulic acid,  
7-Vanillin, 8-Benzoic acid, 9- Phloridzin, 10-Cinnamic acid, 11- Phloretin
